# Supplementary material for: Toward the diagnosis of rare childhood genetic diseases: what do parents value most?
Source: PubMed Central journal article supplement (PMC8484431; doi:10.1038/s41431-021-00882-1), 2021-04-26
Supplement: 41431_2021_882_MOESM2_ESM.pdf [file 41431_2021_882_MOESM2_ESM.pdf]

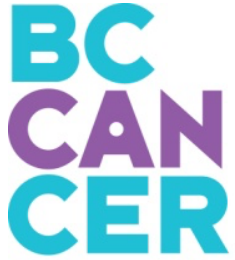

Provincial Health Services Authority

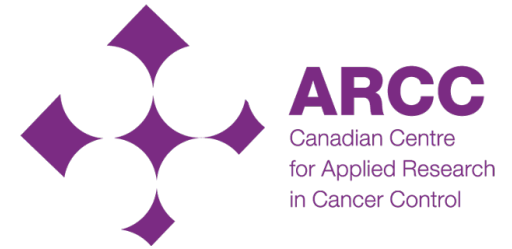

# Your views on genetic testing for children with rare diseases

Focus Group Session

# Housekeeping

- Your participation is voluntary
- There are no right or wrong answers
- Please allow everyone the chance to speak
- We ask for you to respect the privacy of your fellow focus group members

# Why we have invited you here today

**What will we be discussing?**

Your opinions about genetic testing to diagnose rare diseases in children



**How will we use our findings?**

To shape health policy related to genetic testing for children with suspected rare diseases

# Rare diseases: Individually rare but affecting many

6,000 to 8,000  
known rare diseases

Each affecting less  
than 1 in 2,000  
people

1 in 12 Canadians  
are affected

Most rare diseases  
are genetic in origin

# What is the diagnostic odyssey?

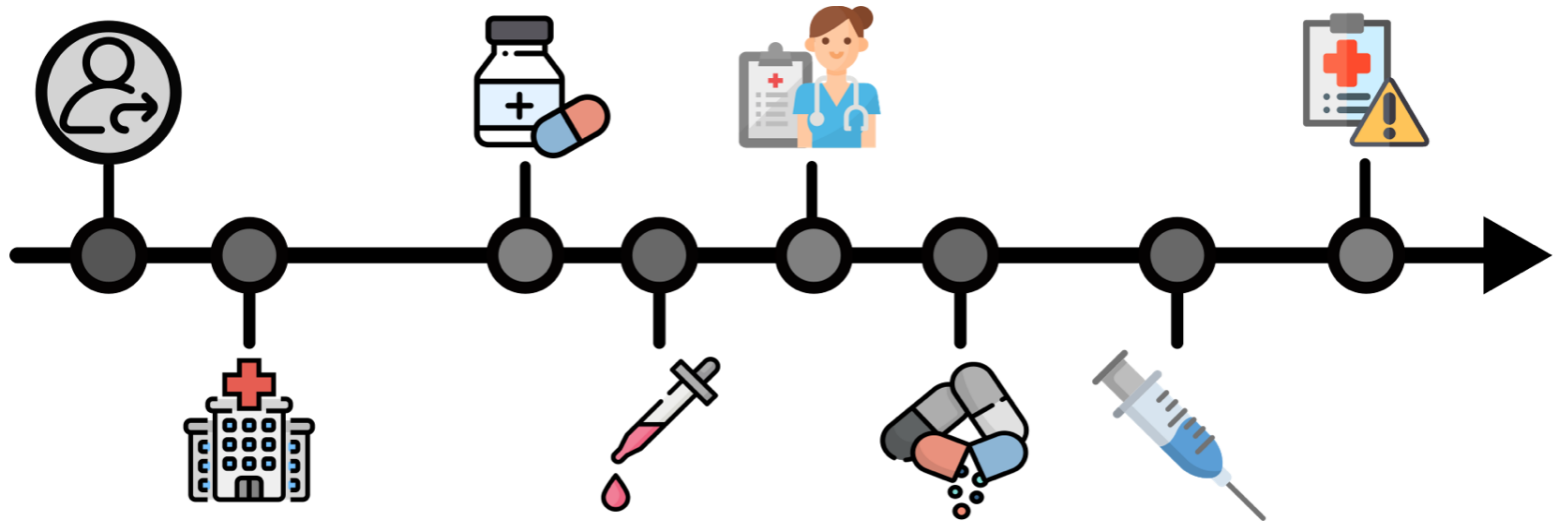

# What is genetic testing?

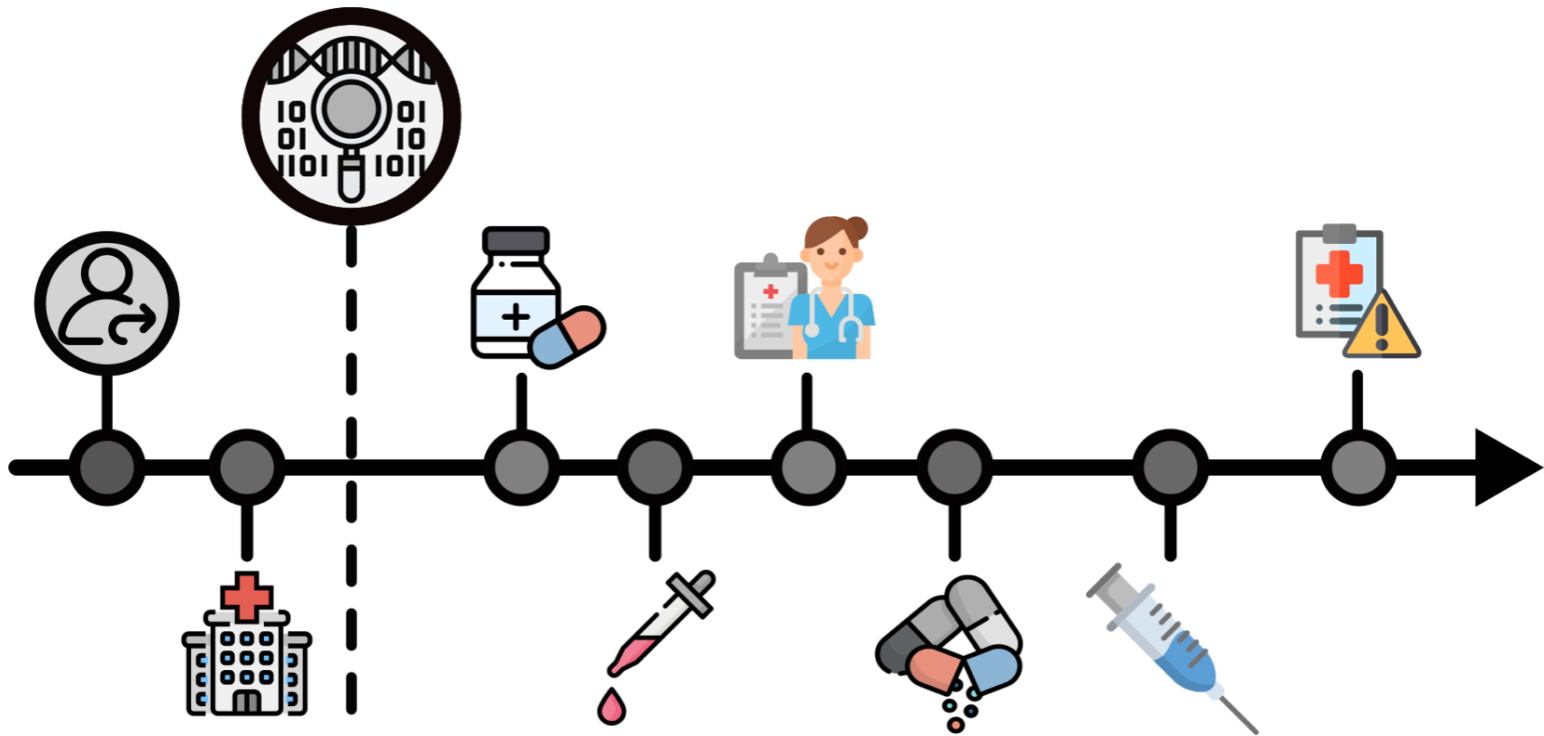

# Test results

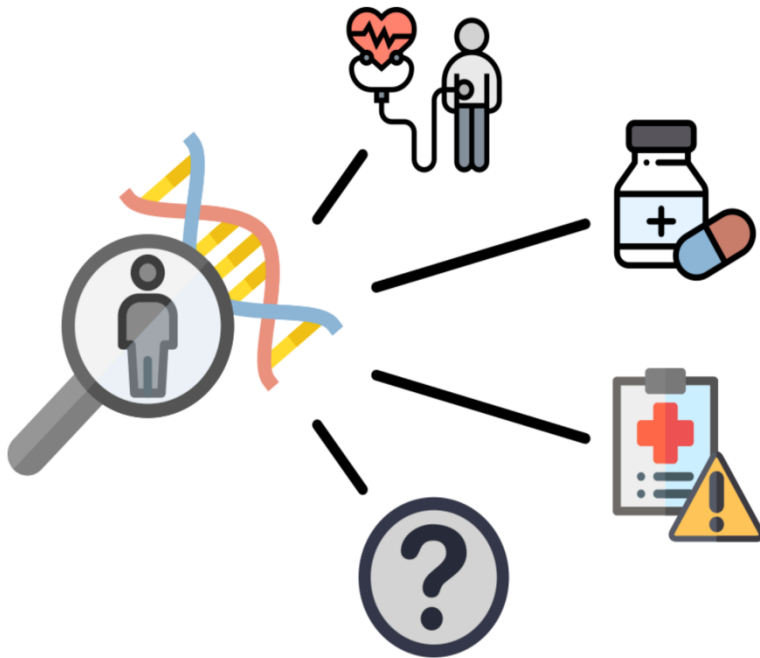

Earlier diagnosis

Better treatment

Disease risk

No information

Uncertain information

# Supporting decision making

- Genetic Counsellors

- Experts in genetics and genetic diseases
- Provide education
- Ensure your understanding
- Discuss test results and next steps

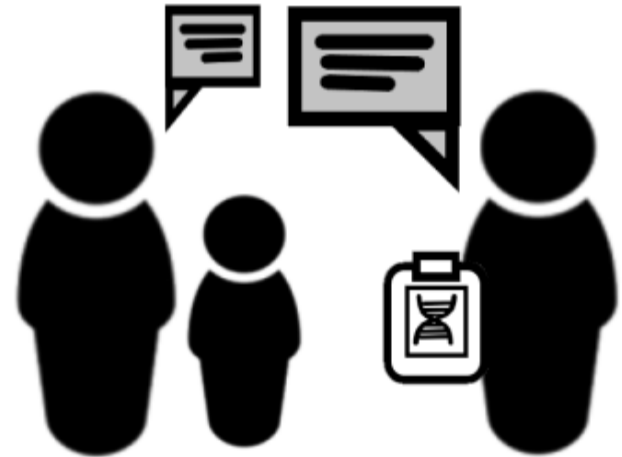



# Today's discussion

Imagine that your child has a disability or severe illness. Doctors have not been able to find a cause.

What is important to you when making a decision about genetic testing for your child?
